# Supplementary material for: Systolic Blood Pressure Within 24 Hours After Thrombectomy for Acute Ischemic Stroke Correlates With Outcome
Source: PubMed Central journal article supplement — J Am Heart Assoc. 2017 May 18;6(5):e006167. doi: 10.1161/JAHA.117.006167 (PMC5524120; doi:10.1161/jaha.117.006167), 2017-05-18
Supplement: JAH3-6-e006167-s001.pdf [file JAH3-6-e006167-s001.pdf]

# **SUPPLEMENTAL MATERIAL**

**Table S1. Odds ratios\* from regression analyses of study variables with 90-day mRS**

|                                       | Unadjusted       |         | Adjusted         |         | Adjusted with discharge destination |         |
|---------------------------------------|------------------|---------|------------------|---------|-------------------------------------|---------|
|                                       | Odds ratio       | p-value | Odds ratio       | p-value | Odds ratio                          | p-value |
| Age <sup>†</sup>                      | 1.04 [1.03-1.08] | <0.001  | 1.03 [1.01-1.06] | 0.005   | 1.02 [0.99-1.04]                    | 0.18    |
| Male sex                              | 0.96 [0.45-1.43] | 0.88    | n/a              | n/a     | n/a                                 | n/a     |
| Hypertension                          | 2.10 [1.23-4.63] | 0.01    | 1.06 [0.57-1.99] | 0.85    | 0.57 [0.29-1.13]                    | 0.11    |
| Hyperlipidemia                        | 1.18 [0.83-2.61] | 0.52    | n/a              | n/a     | n/a                                 | n/a     |
| Diabetes mellitus <sup>‡</sup>        | 1.08 [0.89-3.13] | 0.78    | n/a              | n/a     | 0.53 [0.28-1.01]                    | 0.05    |
| Recent or active smoker               | 0.82 [0.42-1.65] | 0.50    | n/a              | n/a     | n/a                                 | n/a     |
| Atrial fibrillation                   | 1.90 [1.06-3.60] | 0.02    | 0.99 [0.52-1.91] | 0.99    | 0.72 [0.36-1.46]                    | 0.36    |
| Antiplatelet drug use                 | 1.22 [0.80-2.82] | 0.48    | n/a              | n/a     | n/a                                 | n/a     |
| Anticoagulant use                     | 1.00 [0.54-2.10] | 1.00    | n/a              | n/a     | n/a                                 | n/a     |
| NIH Stroke Scale <sup>†</sup>         | 1.15 [1.11-1.24] | <0.001  | 1.13 [1.08-1.18] | <0.001  | 1.10 [1.04-1.15]                    | <0.001  |
| Vessel occlusion <sup>§</sup>         | 1.48 [1.06-2.62] | 0.05    | 1.41 [0.91-2.18] | 0.12    | 1.05 [0.67-1.65]                    | 0.83    |
| Left circulation stroke               | 1.36 [0.62-1.92] | 0.23    | n/a              | n/a     | n/a                                 | n/a     |
| IV tPA                                | 0.66 [0.34-1.07] | 0.10    | 0.64 [0.37-1.13] | 0.12    | 0.61 [0.33-1.11]                    | 0.11    |
| Time to groin puncture <sup>†</sup>   | 1.00 [1.00-1.00] | 0.01    | 1.00 [1.00-1.00] | 0.13    | 1.00 [1.00-1.00]                    | 0.23    |
| mTICI <sup>  </sup>                   | 0.74 [0.58-0.93] | 0.01    | 0.74 [0.57-0.95] | 0.02    | 0.90 [0.68-1.19]                    | 0.48    |
| Anti-hypertensive IV drip use         | 2.48 [2.03-8.79] | 0.003   | 1.50 [0.78-2.89] | 0.23    | 1.07 [0.52-2.18]                    | 0.86    |
| Vasopressor IV drip use               | 1.24 [0.46-2.18] | 0.54    | n/a              | n/a     | n/a                                 | n/a     |
| Hemorrhagic complication <sup>#</sup> | 2.78 [1.73-5.58] | <0.001  | 2.05 [1.24-3.41] | 0.005   | 0.88 [0.50-1.56]                    | 0.67    |
| Discharge destination <sup>**</sup>   | 10.4 [4.81-17.1] | <0.001  | n/a              | n/a     | 9.17 [5.88-14.3]                    | <0.001  |

\*Odds ratios from ordinal regression with mRS (treated as an ordinal variable from 0-6) are reported with their corresponding 95% confidence intervals for complete-case analysis (n=190); <sup>†</sup>Treated as a continuous variable. <sup>‡</sup>Reintroduction in the final adjusted, multivariable regression model with discharge destination resulted in a p-value that met criteria of inclusion in the final model; the statistical values reported are from regression with the final model. Treated as an ordinal variable categorized as <sup>§</sup>M2, M1, ICA, A1; <sup>||</sup>0, 1, 2a, 2b, 3; <sup>#</sup>none, asymptomatic, symptomatic hemorrhage; and <sup>\*\*</sup>home, inpatient rehabilitation, skilled-nursing facility, and long-term acute care facility / death. n/a = not incorporated in the adjusted, multivariable regression model.

**Table S2. Odds ratios\* from regression analyses of study variables with hemorrhagic complications**

|                                     | Unadjusted       |         | Adjusted         |         |
|-------------------------------------|------------------|---------|------------------|---------|
|                                     | Odds ratio       | p-value | Odds ratio       | p-value |
| Age <sup>†</sup>                    | 1.00 [0.98-1.02] | 0.69    | n/a              | n/a     |
| Male sex                            | 1.26 [0.71-2.25] | 0.43    | n/a              | n/a     |
| Hypertension                        | 1.27 [0.65-2.48] | 0.48    | n/a              | n/a     |
| Hyperlipidemia <sup>‡</sup>         | 0.68 [0.38-1.23] | 0.20    | 0.49 [0.26-0.93] | 0.03    |
| Diabetes mellitus                   | 2.24 [1.23-4.08] | 0.01    | 2.07 [1.11-3.88] | 0.02    |
| Recent or active smoker             | 0.73 [0.35-1.53] | 0.40    | n/a              | n/a     |
| Atrial fibrillation                 | 1.09 [0.59-1.99] | 0.79    | n/a              | n/a     |
| Antiplatelet drug use               | 0.64 [0.34-1.23] | 0.18    | n/a              | n/a     |
| Anticoagulant use                   | 0.99 [0.50-1.98] | 0.98    | n/a              | n/a     |
| NIH stroke scale <sup>†</sup>       | 1.08 [1.03-1.12] | 0.001   | 1.07 [1.02-1.12] | <0.001  |
| Vessel occlusion <sup>§</sup>       | 1.33 [0.85-2.07] | 0.21    | n/a              | n/a     |
| Left circulation stroke             | 1.09 [0.62-1.95] | 0.76    | n/a              | n/a     |
| IV tPA                              | 1.52 [0.85-2.71] | 0.16    | n/a              | n/a     |
| Time to groin puncture <sup>†</sup> | 1.00 [1.00-1.00] | 0.33    | n/a              | n/a     |
| mTIC <sup>  </sup>                  | 0.89 [0.69-1.15] | 0.36    | n/a              | n/a     |
| Anti-hypertensive IV drip use       | 2.27 [1.21-4.25] | 0.01    | 1.55 [0.79-3.04] | 0.20    |
| Vasopressor IV drip use             | 0.99 [0.43-2.24] | 0.97    | n/a              | n/a     |

\*Odds ratios from ordinal regression with hemorrhagic complications (treated as an ordinal variable with 3 categories of none, asymptomatic, symptomatic hemorrhage) are reported with their corresponding 95% confidence intervals; <sup>†</sup>Treated as a continuous variable. <sup>‡</sup>Reintroduction in the final adjusted, multivariable regression model with discharge destination resulted in a p-value that met criteria of inclusion in the final model; the statistical values reported are from regression with the final model. Treated as an ordinal variable categorized as <sup>§</sup>M2, M1, ICA, A1, and <sup>||</sup>0, 1, 2a, 2b, 3. n/a = not incorporated in the adjusted, multivariable regression model.

**Table S3. Adjusted odds ratios\* from multivariable ordinal regression analyses† of 90-day mRS with blood pressure parameters after multiple imputations of the 38 missing mRS values (total n=228)**

|            |         | Odds Ratio       | p-value     |
|------------|---------|------------------|-------------|
| <b>SBP</b> | Maximum | 1.02 [1.01-1.03] | <b>0.01</b> |
|            | Minimum | 1.00 [0.98-1.01] | >0.1        |
|            | Average | 1.01 [0.99-1.03] | >0.1        |
| <b>DBP</b> | Maximum | 1.00 [0.99-1.02] | >0.1        |
|            | Minimum | 0.98 [0.96-1.01] | >0.1        |
|            | Average | 0.99 [0.96-1.01] | >0.1        |
| <b>MAP</b> | Maximum | 1.01 [0.99-1.02] | >0.1        |
|            | Minimum | 0.99 [0.98-1.01] | >0.1        |
|            | Average | 1.00 [0.98-1.03] | >0.1        |

\*Odds ratios from ordinal regression with mRS (treated as an ordinal variable from 0-6) are reported with their corresponding 95% confidence intervals; Bold p-values indicate meeting significance after Bonferroni correction of the significance level  $\alpha$ .

†Refers to the regression analysis described initially in the methods of the manuscript, as a stepwise regression was unable to be performed with multiple imputation data sets.

**Table S4. Adjusted odds ratios\* from backward, stepwise multivariable ordinal regression analyses of study outcomes with systolic (SBP), diastolic (DBP), and mean arterial (MAP) blood pressure parameters**

|            | Univariable, unadjusted         |         |                                                |         | Multivariable, adjusted           |         |                                                   |         |
|------------|---------------------------------|---------|------------------------------------------------|---------|-----------------------------------|---------|---------------------------------------------------|---------|
|            | 90-day mRS <sup>†</sup> (n=190) |         | Hemorrhagic Complications <sup>‡</sup> (n=228) |         | 90-day mRS <sup>†,§</sup> (n=190) |         | Hemorrhagic Complications <sup>‡,  </sup> (n=228) |         |
|            | Odds Ratio                      | p-value | Odds Ratio                                     | p-value | Odds Ratio                        | p-value | Odds Ratio                                        | p-value |
| <b>SBP</b> |                                 |         |                                                |         |                                   |         |                                                   |         |
| Maximum    | 1.03 [1.02-1.05]                | <0.001  | 1.02 [1.01-1.04]                               | <0.001  | 1.02 [1.01-1.03]                  | 0.002   | 1.02 [1.01-1.04]                                  | 0.002   |
| Minimum    | 1.00 [0.99-1.02]                | >0.1    | 0.99 [0.97-1.01]                               | >0.1    | -                                 | -       | -                                                 | -       |
| Average    | 1.04 [1.02-1.05]                | <0.001  | 1.01 [0.99-1.03]                               | >0.1    | -                                 | -       | -                                                 | -       |
| <b>DBP</b> |                                 |         |                                                |         |                                   |         |                                                   |         |
| Maximum    | 1.01 [0.99-1.02]                | >0.1    | 1.00 [0.99-1.02]                               | >0.1    | -                                 | -       | -                                                 | -       |
| Minimum    | 0.98 [0.96-1.01]                | >0.1    | 0.97 [0.95-1.00]                               | 0.07    | -                                 | -       | 0.97 [0.94-1.00]                                  | 0.09    |
| Average    | 1.00 [0.98-1.03]                | >0.1    | 1.00 [0.97-1.02]                               | >0.1    | -                                 | -       | -                                                 | -       |
| <b>MAP</b> |                                 |         |                                                |         |                                   |         |                                                   |         |
| Maximum    | 1.03 [1.01-1.04]                | 0.001   | 1.02 [1.00-1.03]                               | 0.07    | -                                 | -       | -                                                 | -       |
| Minimum    | 1.00 [0.98-1.03]                | >0.1    | 0.99 [0.97-1.01]                               | >0.1    | -                                 | -       | -                                                 | -       |
| Average    | 1.03 [1.01-1.05]                | 0.02    | 1.02 [0.99-1.05]                               | >0.1    | -                                 | -       | -                                                 | -       |

\*Odds ratios are reported with their corresponding 95% confidence intervals; <sup>†</sup>mRS (modified Rankin score) is treated as an ordinal variable from 0 (no symptoms at all) to 6 (death); <sup>‡</sup>Hemorrhagic complication is treated as an ordinal variable with three categories: no hemorrhage, asymptomatic, and symptomatic hemorrhage; Bold p-values indicate meeting significance after Bonferroni correction of the significance level  $\alpha$ . At the completion of the backward, stepwise regression, other variables that remained included in the <sup>§</sup>mRS multivariate model: age (1.03 [1.01-1.05]; p=0.002), hemorrhage complication (2.02 [1.22-3.35]; p=0.007), NIHSS (1.13 [1.08-1.18]; p<0.001), mTICI (0.78 [0.61-1.01]; p=0.06), and IV tPA (0.56 [0.33-0.97]; p=0.04); and in the <sup>||</sup>hemorrhagic complications multivariate model: diabetes mellitus (2.72 [1.40-5.31]; p=0.003), NIHSS (1.06 [1.02-1.11]; p=0.007), and hyperlipidemia (0.43 [0.22-0.84]; p=0.002). – denotes variable that did not meet significance for inclusion in the multivariate model.

Figure S1

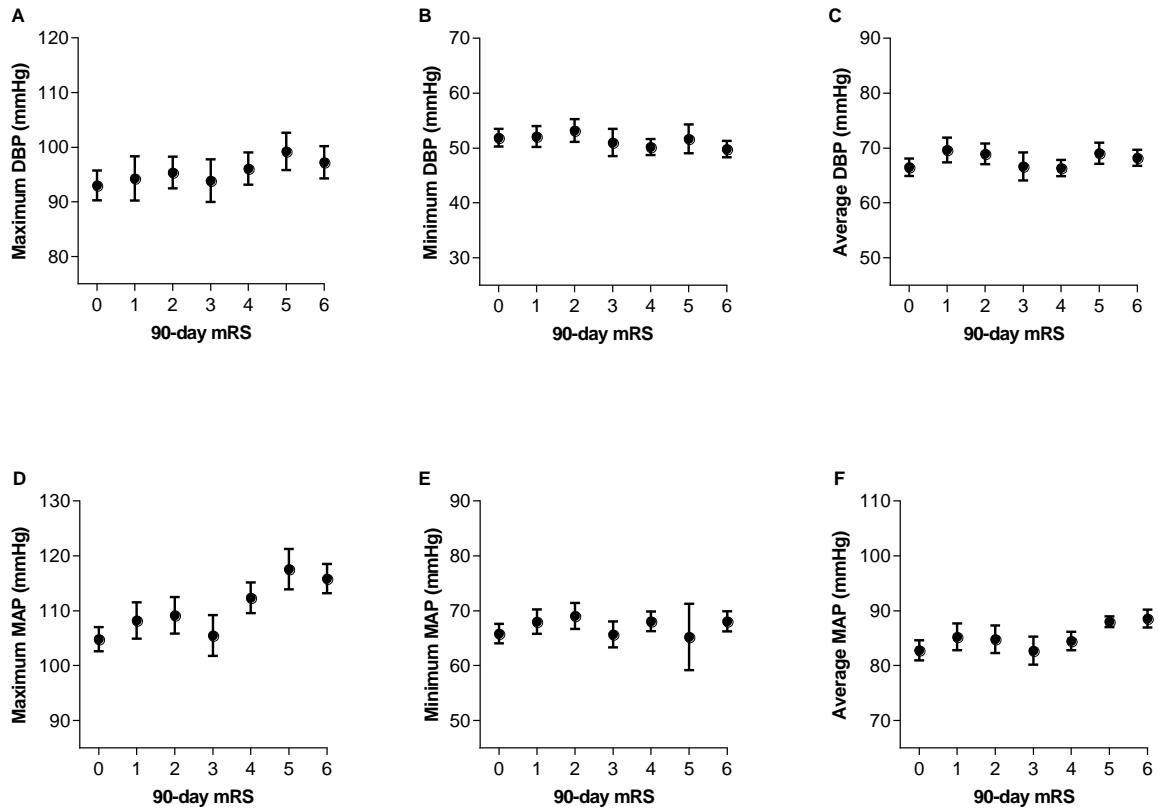

Figure S1. Mean values of maximum, minimum, and average diastolic (A, B, C; DBP) and mean arterial (E, F, G; MAP) blood pressure are plotted with 90-day modified Rankin scale (mRS). Error bar represent standard error of means.

Figure S2

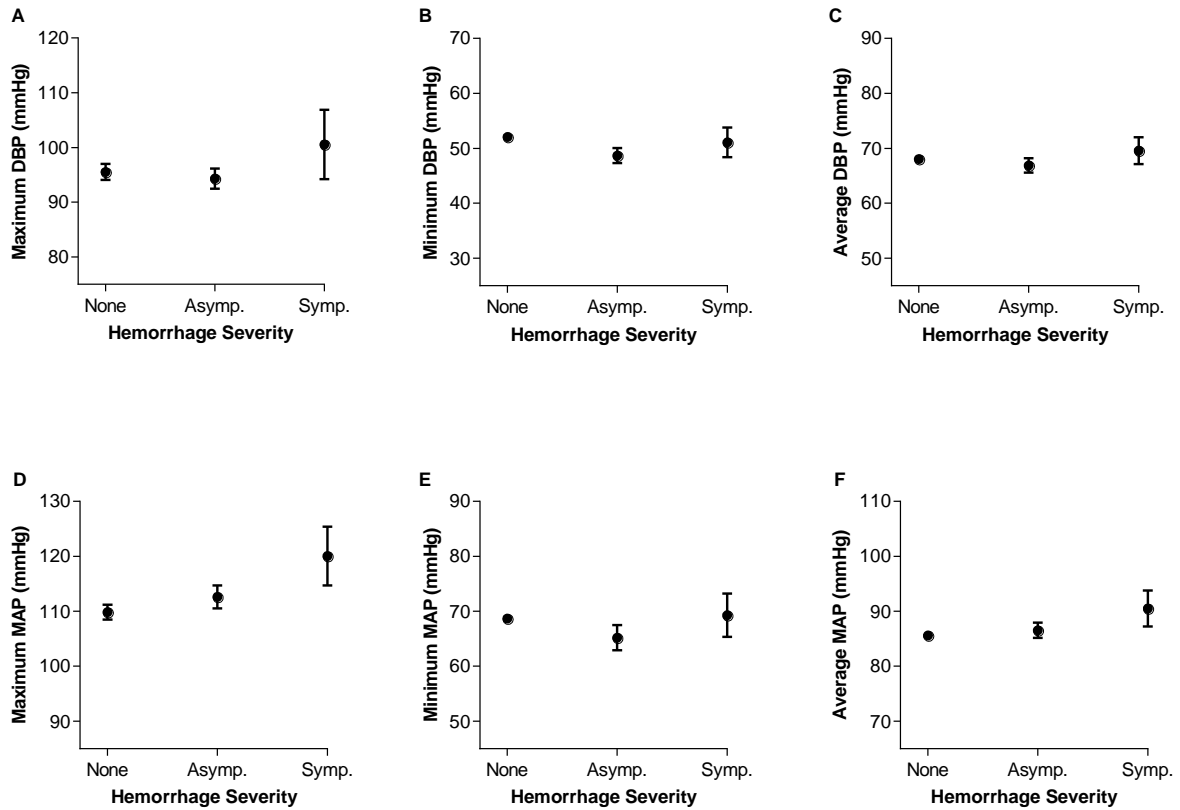

**Figure S2. Mean values of maximum, minimum, and average diastolic (A, B, C; DBP) and mean arterial (E, F, G; MAP) blood pressure are plotted with hemorrhagic complications.** Hemorrhagic complications are graded based on their severity: none, asymptomatic (asyp.), and symptomatic (symp.) hemorrhages. Error bar represent standard error of means.

**Figure S3**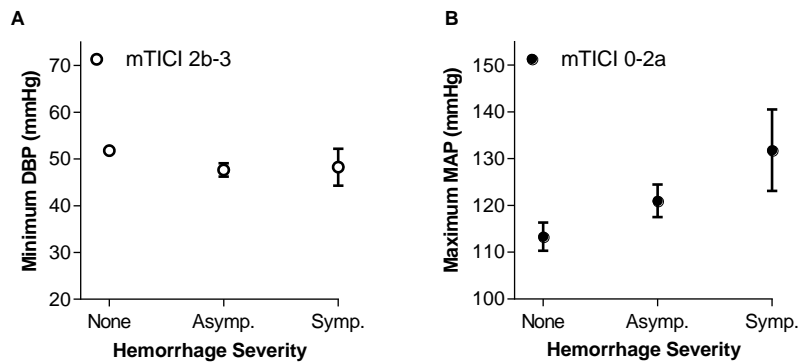

**Figure S3. In A, mean minimum diastolic blood pressure (DBP) in recanalized (mTICI 2b-3) and in B, maximum mean arterial pressure (MAP) in non-recanalized (mTICI 0-2a) patients are plotted with hemorrhagic complications. Hemorrhagic complications are graded based on their severity: none, asymptomatic (asyp.), and symptomatic (symp.) hemorrhages. Error bar represent standard error of means.**
